# Supplementary material for: Nebulization versus standard application for topical anaesthesia during flexible bronchoscopy under moderate sedation – a randomized controlled trial
Source: Respir Res. 2018 Nov 21;19:227. doi: 10.1186/s12931-018-0926-5 (PMC6249909; doi:10.1186/s12931-018-0926-5)
Supplement: Supplementary file 1 — Supplementary data. (XLSX 20 kb) [file 12931_2018_926_MOESM1_ESM.xlsx]

## Sheet: data
ID	randomization	age	size	weight	pack years	sex	ASA	Midazolam	Propofol	Fentanyl	Lidocacin	pO2 pre-interventional	pCO2 pre-interventional	pO2 post-interventional	pCO2 post-interventional	duration	global tolerance score	vomitting	asphyxia	pain	cough	Aldrete > 9 after	SPO2 < 90%	average supplemental oxygen flow rate	average SPO2	average heart rate	average systolic blood pressure	average diastoloic blood pressure	FEV1	Indication
1	nebulizer	65	170	106	30	male	2	1.5	100	0	200	93.3	37.1	83.7	39.4	00:12:00	0	0	0	0	0	10	0	2	99.6667	87.6667	134.333	64	79	lung cancer
2	syringe	70	176	72	0	male	2	1.5	40	0	280	71.9	37.1	54.8	42.4	00:09:00	0	0	0	0	50	10	0	2	98	92.5	135	85	61	lung cancer
3	syringe	72	189	90	0	male	2	1.5	90	0	280	56.9	36.3	45.3	39	00:15:00	50	50	0	0	50	5	1	2.5	92.5	77.75	149.75	69.5	69	unexplained opacities
4	nebulizer	71	172	73	50	male	4	1.5	20	0	160	54.1	38.8	60.7	44.7	00:09:00	0	0	0	0	0	5	0	2	91.5	74.5	106.5	65	55	lung cancer
5	nebulizer	82	175	70	0	male	4	1.5	50	0	160	61.2	38.7	62.4	40.4	00:11:00	0	0	0	0	50	10	0	2	99	72.6667	104	59.3333	77	ILD
6	syringe	54	187	95	18	male	4	1.5	140	0.1	200	86.7	37.9	58	47.3	00:10:00	0	0	0	0	50	10	1	2.66667	92	86	128.333	74.6667	85	lung cancer
7	syringe	78	152	75	0	female	3	1.5	60	0	200	53.6	45.4	92.3	51.1	00:15:00	50	0	0	0	50	0	0	2	98	80.75	135.333	61.6667	66	unexplained opacities
8	nebulizer	52	161	61	0	female	1	1.5	80	0	180	73.6	40.5	77.2	41	00:11:00	0	50	0	0	50	0	0	2	98.6667	71.6667	99	49.6667	75	lung cancer
9	syringe	78	185	85	0	male	3	1.5	40	0	360	59.7	27.6	57.1	30.5	00:09:00	0	0	0	0	50	5	0	2	97	91	132	79	87	ILD
10	nebulizer	65	164	73	35	male	3	1.5	30	0	160	63.7	37.6	75.5	44.6	00:10:00	0	0	0	0	0	10	0	2	92.5	88.5	136	73.5	59	other
11	syringe	54	186	87	36	male	4	1.5	120	0	240	73.9	38.8	61.2	43.4	00:20:00	0	0	0	0	0	10	0	2	95	107	143.5	94.5	91	hemoptysis
12	nebulizer	47	173	64	17	female	1	1.5	130	0.1	200	73.5	33.9	85	41.4	00:10:00	0	0	0	0	50	5	0	2	95	65.3333	101.333	54.6667	49	hemoptysis
13	nebulizer	81	183	71	0	male	2	1.5	60	0	200	58.7	37.5	58.7	42.8	00:05:00	0	0	0	0	0	10	0	2	95.5	74.5	106	61.5	75	other
14	nebulizer	68	161	70	10	female	3	1.5	60	0	180	88.6	31.2	100	36.2	00:09:00	0	0	0	0	50	5	0	2	99	89.5	169	80	91	lung cancer
15	syringe	36	167	53	10	female	2	1.5	90	0.05	240	77.2	37.4	90	41.5	00:20:00	50	0	0	50	100	5	1	2.8	94.2	106.2	99	62.3333	52	ILD
16	syringe	57	158	45.5	0	female	2	1.5	50	0.1	240	82.6	43.1	104	54.6	00:16:00	0	0	0	0	0	5	2	3.2	92.8	73.6	112.8	63	94	other
17	nebulizer	56	180	98	0	female	2	1.5	30	0.05	180	63	41.9	64.3	46.1	00:07:00	0	0	0	0	50	5	0	2	96.5	40.5	73.5	30.5	30	lung cancer
18	syringe	84	176	85	0	male	3	1.5	50	0	280	72.9	35.2	62.8	40	00:10:00	0	0	0	0	50	5	0	2	96.6667	71	131.667	56	87	ILD
19	nebulizer	63	178	80	0	male	3	2.5	100	0.05	180	50.5	32.7	55.1	35	00:15:00	0	0	0	0	0	15	2	3.5	89.5	73.5	110.25	69.75	67	ILD
20	syringe	60	156	57	0	female	2	1.5	50	0	240	68	35.9	76.4	44.2	00:10:00	0	0	0	0	50	5	0	2	99	95.6667	111.333	82.3333	87	ILD
21	nebulizer	70	176	86	25	male	2	1.5	40	0	180	65.2	35.3	75.8	38.5	00:10:00	0	0	0	0	50	0	1	2	96.6667	77.3333	120.667	76.3333	91	unexplained opacities
22	syringe	79	180	95	0	male	2	1.5	40	0	240	69.3	35	63.8	41.6	00:10:00	0	0	0	0	50	5	1	3.33333	92	81	124.333	64.6667	79	ILD
23	syringe	60	180	91	45	male	3	1.5	50	0	240	51.9	48.8	65.6	52.8	00:11:00	0	0	0	0	50	5	3	3.33333	88.6667	86	92.6667	60.3333	32	hemoptysis
24	nebulizer	77	185	87	0	male	3	1.5	50	0	160	61.7	38.5	81	45.4	00:10:00	0	0	0	0	50	10	0	2	95.6667	82	115	68.6667	44	hemoptysis
25	syringe	59	183	90	35	male	2	2	50	0.05	240	61.7	34.1	65	38.9	00:15:00	0	0	0	0	0	0	0	2	94.5	86.25	128.5	78.5	72	unexplained opacities
26	syringe	59	154	89	34	female	2	2	160	0.1	240	116	31.3	109	35.3	00:20:00	0	0	0	0	50	0	2	3.2	89	80.2	132.6	90	129	ILD
27	nebulizer	74	186	102	0	male	3	2	60	0	160	62.4	34	89.7	36.6	00:15:00	0	0	0	0	50	0	1	2	94.25	70.25	118.5	58.75	81	unexplained opacities
28	nebulizer	73	163	85	0	female	2	2	80	0.1	140	54.9	28.8	70.3	37.9	00:09:00	0	0	0	0	50	5	0	2	98	82.5	143.5	74.5	115	other
29	nebulizer	58	169	93.2	0	female	2	1.5	50	0	140	104	37.1	77.5	38.7	00:09:00	0	0	0	0	50	5	0	2	96.5	90	134.5	72.5	78	other
30	syringe	58	158	62	0	female	2	2	90	0.1	240	63.4	35.1	87.5	41.2	00:25:00	50	0	50	0	50	0	2	3	93.1667	86.5	122.833	81	76	unexplained opacities
31	nebulizer	77	167	77	0	male	4	2	30	0.05	160	78.3	32.4	75.3	36.5	00:15:00	0	0	0	0	50	5	0	3	97	86	127	70.3333	102	lung cancer
32	syringe	75	165	64	0	male	3	1.5	50	0	240	57	35	51.5	40.8	00:11:00	0	0	0	0	50	5	2	3.33333	93.3333	84	135	55	74	ILD
33	nebulizer	65	180	108	30	male	3	2	50	0	140	59.5	39.3	89.1	37.5	00:16:00	0	0	0	0	0	5	0	2	97.25	54	105.75	59.25	76	other
34	nebulizer	68	167	68	40	male	2	2	50	0	140	59.3	39.7	62	47.4	00:10:00	0	0	0	0	0	0	0	2	97.6667	116	110.333	69.3333	48	lung cancer
35	syringe	67	157	67	0	female	2	1.5	30	0.05		82	32.7	71.6	40	00:16:00	50	0	0	0	50	5	0	3	95.5	98.5	135.5	67.5	81	ILD
36	syringe	75	174	92	0	male	4	2	70	0	240	108	35.5	82.3	41	00:15:00	0	0	0	0	0	0	0	2	98.25	65.75	135.5	80	74	unexplained opacities
37	nebulizer	55	186	68	20	male	2	1.5	170	0	140	81.8	28.8	69.8	41.9	00:08:00	0	0	0	0	0	5	0	0.666667	93.6667	85	118.667	67	ND	unexplained opacities
38	syringe	52	160	51	30	female	2	1.5	80	0	120	85.3	36.7	91	40	00:14:00	0	0	0	0	50	5	0	2	98.5	85.5	101	67.5		other
39	nebulizer	65	178	116	0	male	3	2	50	0	160	60.3	35.3	83.2	38	00:09:00	50	0	0	0	50	5	0	2	96	75	136	83	108	lung cancer
40	syringe	45	186	105	0	male	4	1.5	160	0.1	240	44.8	31.5	74.5	35.7	00:23:00	100	0	100	0	0	10	3	13	88.6667	92.6667	130.2	72.25		unexplained opacities
41	nebulizer	73	179	95	0	male	2	1.5	100	0.1	160	70	35.3	77.8	48.4	00:20:00	0	0	0	0	0	5	1	2	96.6	82.6	144.4	82	ND	hemoptysis
42	syringe	57	174	94	30	male	4	2	30	0.1		88.7	51	102	59.4	00:22:00	0	0	0	0	0	0	0	2.8	96.6	78.6	128.6	88	75	lung cancer
43	syringe	60	180	97	0	male	2	2	10	0.1		103	36.6	72.6	38.7	00:11:00	0	0	0	0	0	0	0	3.33333	95.3333	68.6667	140	70.6667	114	ILD
44	nebulizer	65	178	117	50	male	3	2	90	0	120	66	36.9	68.6	40.4	00:10:00	0	0	0	0	0	0	0	2	95	84.3333	138.333	72.3333	60	lung cancer
45	nebulizer	64	180	104	0	male	2	1.5	70	0	140	67	35.9	87.4	38.4	00:10:00	0	0	0	0	0	0	0	2	98.6667	65.6667	167	82.3333	97	other
46	syringe	59	160	75	25	female	2	2	50	0	240	58.3	37.5	63	47.8	00:12:00	0	0	0	0	0	5	0	2	92.3333	90.6667	121	65	96	lung cancer
47	syringe	67	168	77.5	0	male	3	1.5	30	0	280	44.5	23.7	57.3	26.3	00:10:00	50	50	0	50	50	0	1	11.6667	89.3333	95.3333	112.667	71	75	ILD
48	nebulizer	57	160	80	42	female	3	3	60	0	160	44.2	44	54.4	56.1	00:13:00	0	0	0	0	0	10	0	4	96.5	82.25	129	79	52	ILD
49	nebulizer	76	169	89	0	male	2	2	30	0	180	64	41.8	79.8	42.2	00:16:00	0	0	0	0	0	0	0	2	99.5	72.75	119	65	90	lung cancer
50	syringe	83	164	71	0	female	3	1.5	30	0	240	53	38.3	62	41.1	00:07:00	0	0	0	0	0	10	0	4	95	76.5	152	72.5	42	ILD
51	syringe	77	170	78	40	male	3	2	30	0	280	62.8	38.4	54.6	44.3	00:25:00	0	0	0	0	0	5	2	4.8	91	78	119.8	67	70	lung cancer
52	nebulizer	64	180	95	0	male	3	2	10	0.1	160	52.2	38.2	66.6	45.1	00:15:00	50	0	0	0	50	0	0	2	97.75	74	154.25	88.5	57	ILD
53	nebulizer	70	170	96	51	female	2	2	60	0	180	58.3	35.9	83.4	43.1	00:10:00	0	0	0	0	50	5	0	2	99	92.3333	140.667	94.6667	97	ILD
54	nebulizer	79	178	87	30	male	2	1.5	50	0	160	59.7	33.9	61.5	39.2	00:12:00	0	0	0	0	0	5	0	2	94.25	76	158.5	74.5	91	unexplained opacities
55	syringe	53	170	80	30	female	2	2	40	0	240	41.2	75.3	43.2	67.4	00:10:00	0	0	0	0	0	5	0	2	97	97.6667	109.667	68.3333	44	other
56	syringe	64	160	65	30	female	2	2	110	0	280	66.8	38.2	78.1	43.6	00:25:00	0	0	0	0	50	0	3	3.66667	95.8333	83	120.8	56.6	83	lung cancer
57	nebulizer	82	178	75	30	male	2	2	40	0	160	70.2	37	73	39.8	00:24:00	0	0	0	0	0	0	0	2	94	86.8	119.8	76.8	52	lung cancer
58	nebulizer	75	168	105	30	female	3	2	70	0.1	200	77.7	32.8	76.2	47.3	00:25:00	0	0	0	0	50	0	1	3.2	94.8	122	114.8	60	81	lung cancer
59	syringe	73	172	115	20	male	3	2	20	0	320	50.5	38.8	63.6	37.4	00:10:00	0	0	0	0	50	0	0	4	93.3333	81.6667	120.333	64	65	ILD
60	syringe	69	170	77	40	male	2	2	30	0	280	67.2	34.8	52.2	35.2	00:14:00	0	0	0	0	0	0	1	2	93.75	84	115.75	83	110	lung cancer
